# Supplementary material for: Fabrication of Fe3O4@poly(methyl methacrylate-co-glycidyl methacrylate) microspheres via miniemulsion polymerization using porous microspheres as templates for removal of cationic dyes
Source: Royal Society of Chemistry journal article supplement (doi:10.1039/d2nj01440h), 2022-01-01
Supplement: d2nj01440h1.pdf [file d2nj01440h1.pdf]

## Supplementary Information for

### **Fabrication of Fe<sub>3</sub>O<sub>4</sub>@poly(methyl methacrylate-co-glycidyl methacrylate) microspheres via miniemulsion polymerization using porous microspheres as templates for removal of cationic dyes**

Hong Man <sup>a</sup>, Yingrui Nie <sup>a</sup>, Shimin Shao <sup>a</sup>, Yang Wang <sup>b</sup>, Zhifei Wang <sup>a</sup> and Yong Jiang\* <sup>a</sup>

<sup>a</sup> School of Chemistry and Chemical Engineering, Southeast University, Nanjing 211189, P.R. China

<sup>b</sup> School of Material Science and Engineering, Jiangsu University of Science and Technology, Zhenjiang 212100, P. R. China

E-mail: yj@seu.edu.cn.

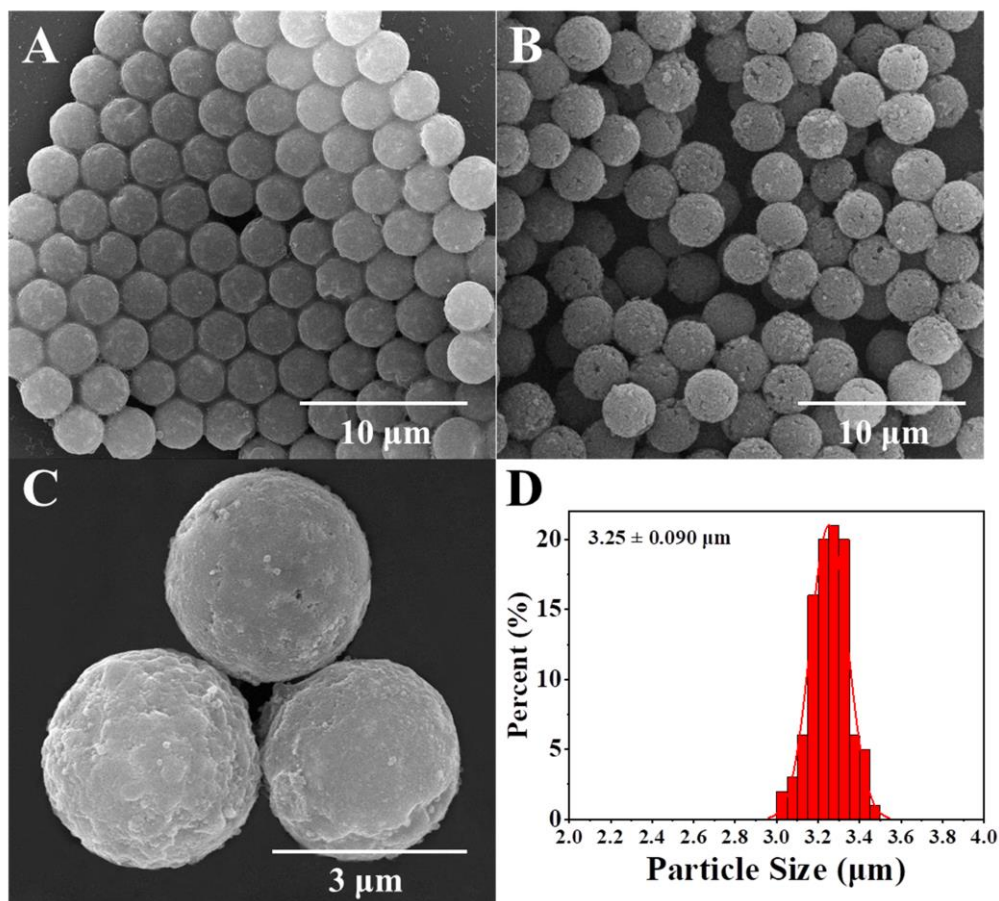

**Fig. S1** SEM images of (A) magnetic  $\text{Fe}_3\text{O}_4@P(\text{MMA-co-GMA})$  microspheres; (B) (C) magnetic  $\text{Fe}_3\text{O}_4@P(\text{MMA-co-GMA})$  microspheres with 3/4 monomer addition volume; (D) Particle size distribution of magnetic  $\text{Fe}_3\text{O}_4@P(\text{MMA-co-GMA})$  microspheres.

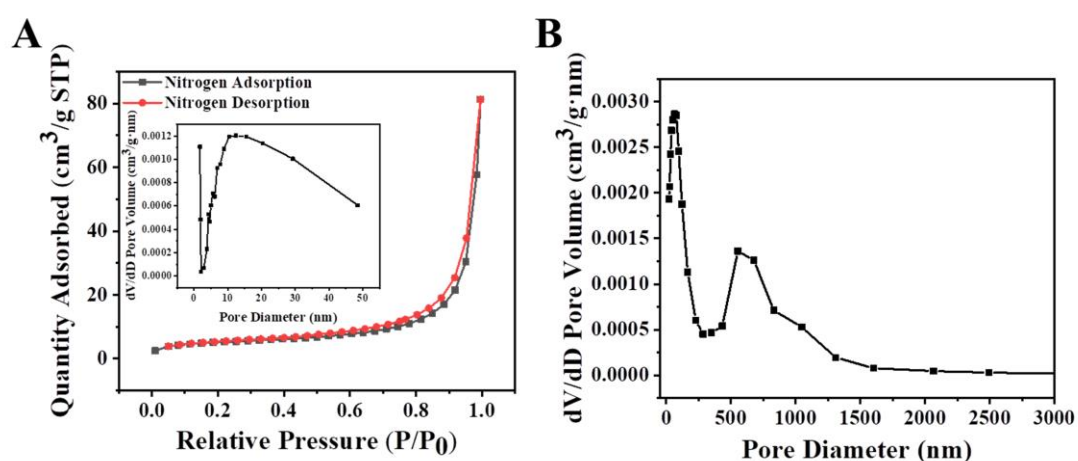

**Fig. S2** (A) Adsorption-desorption isotherms of  $\text{N}_2$  and the mesopore pore size distribution (inset) of porous  $P(\text{MMA-co-GMA})$  microspheres; (B) Macropore pore size distribution of porous  $P(\text{MMA-co-GMA})$  microspheres by MIP.

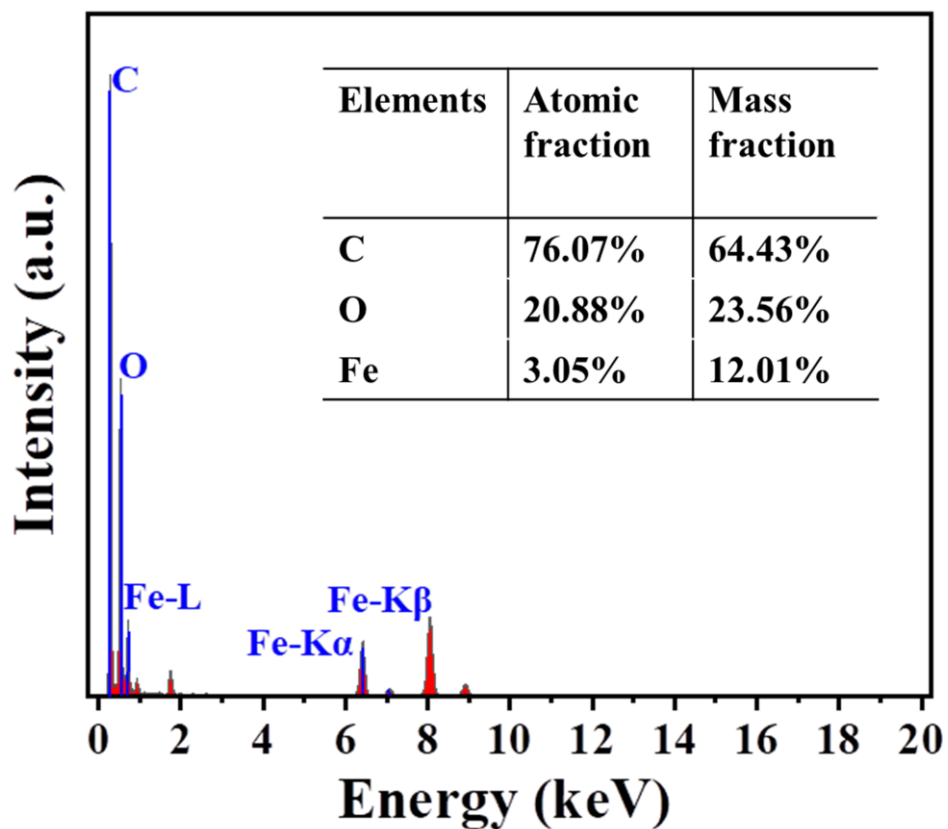

Fig. S3 EDX analyses of magnetic Fe<sub>3</sub>O<sub>4</sub>@P(MMA-co-GMA) microspheres.

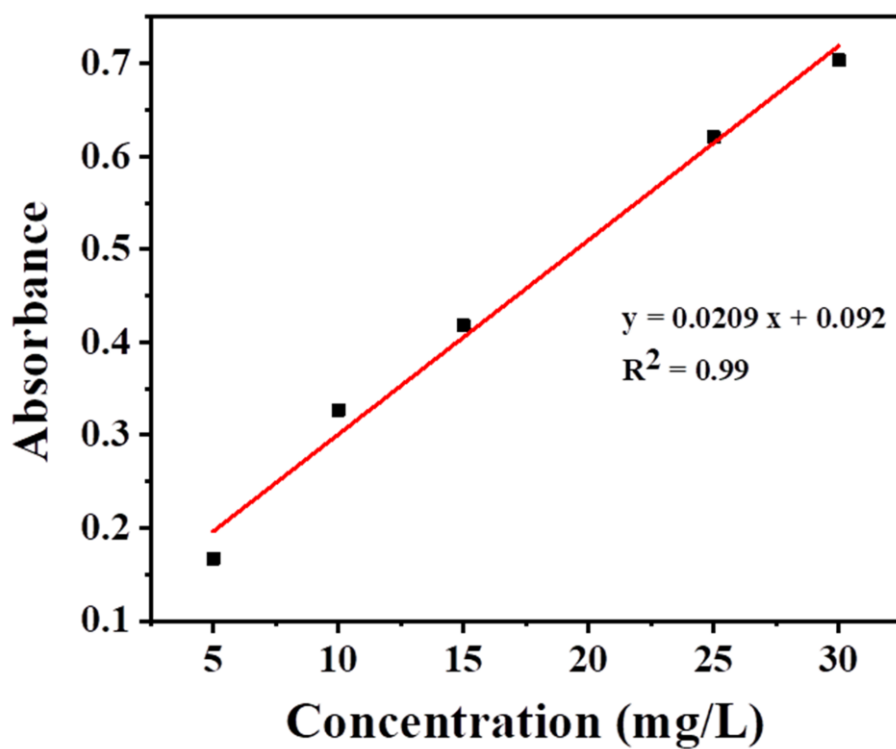

Fig. S4 Standard curve of UV absorption of Nile blue dyes.

**Table S1** Recycle performance of magnetic Fe<sub>3</sub>O<sub>4</sub>@P(MMA-co-GMA) microspheres in adsorption-desorption cycles.

| <b>Recycle time</b> | <b>Dye adsorption capacity (mg/g)</b> | <b>Dye adsorption efficiency (%)</b> | <b>Dye desorption capacity (mg/g)</b> | <b>Dye desorption efficiency (%)</b> |
|---------------------|---------------------------------------|--------------------------------------|---------------------------------------|--------------------------------------|
| <b>1</b>            | 99.5                                  | 99.5                                 | 91.0                                  | 91.5                                 |
| <b>2</b>            | 97.4                                  | 97.4                                 | 87.3                                  | 89.6                                 |
| <b>3</b>            | 97.1                                  | 97.1                                 | 85.2                                  | 87.7                                 |
| <b>4</b>            | 95.2                                  | 95.2                                 | 82.1                                  | 86.2                                 |
| <b>5</b>            | 94.3                                  | 94.3                                 | 79.7                                  | 84.6                                 |
| <b>6</b>            | 95.0                                  | 95.0                                 | 79.3                                  | 83.5                                 |
| <b>7</b>            | 93.3                                  | 93.3                                 | 75.3                                  | 80.7                                 |
